# Supplementary material
Source: PubMed Central journal article supplement (PMC3820927)
Supplement: supp_M113.030742_mcp.M113.030742-1.pdf [file supp_M113.030742_mcp.M113.030742-1.pdf]

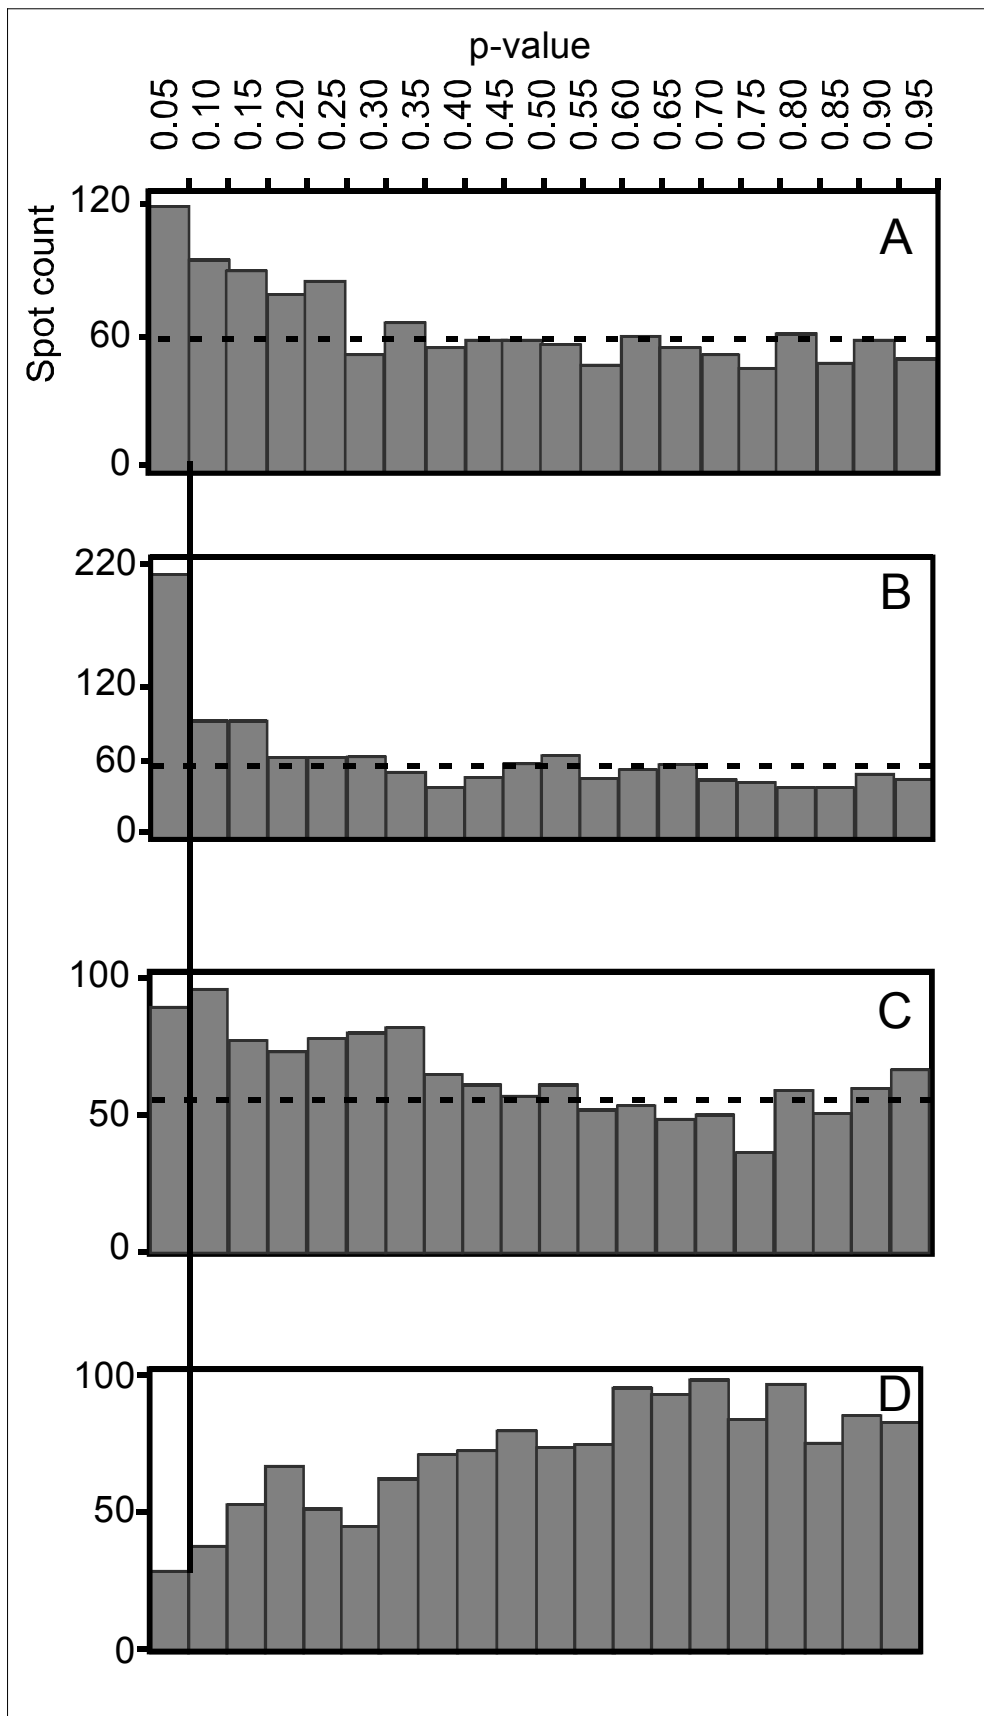

Supplementary Figure 1: Statistical analysis of the proteomic results

This figure shows the distribution of the t-tests for all spots detected in the image analysis of the 2D gels (4 independent biological replicates per condition). This allows to estimate the proportion of false positives, i.e. spots detected only through random processes, in the selected spots, i.e. those with a t-test lower than 0.05. The dotted line indicates the false positive threshold

A: copper nanoparticles ( $10 \mu\text{g/ml}$ ) compared to control

B: copper oxide nanoparticles ( $10 \mu\text{g/ml}$ ) compared to control

C: copperII chloride ( $200 \mu\text{M}$ ) compared to control

D: copperII chloride ( $25 \mu\text{M}$ ) compared to control

This figure indicates that low concentrations of copper chloride do not induce significant changes, while higher
