# Supplementary material
Source: PubMed Central journal article supplement (PMC3820927)
Supplement: supp_M113.030742_mcp.M113.030742-2.pdf [file supp_M113.030742_mcp.M113.030742-2.pdf]

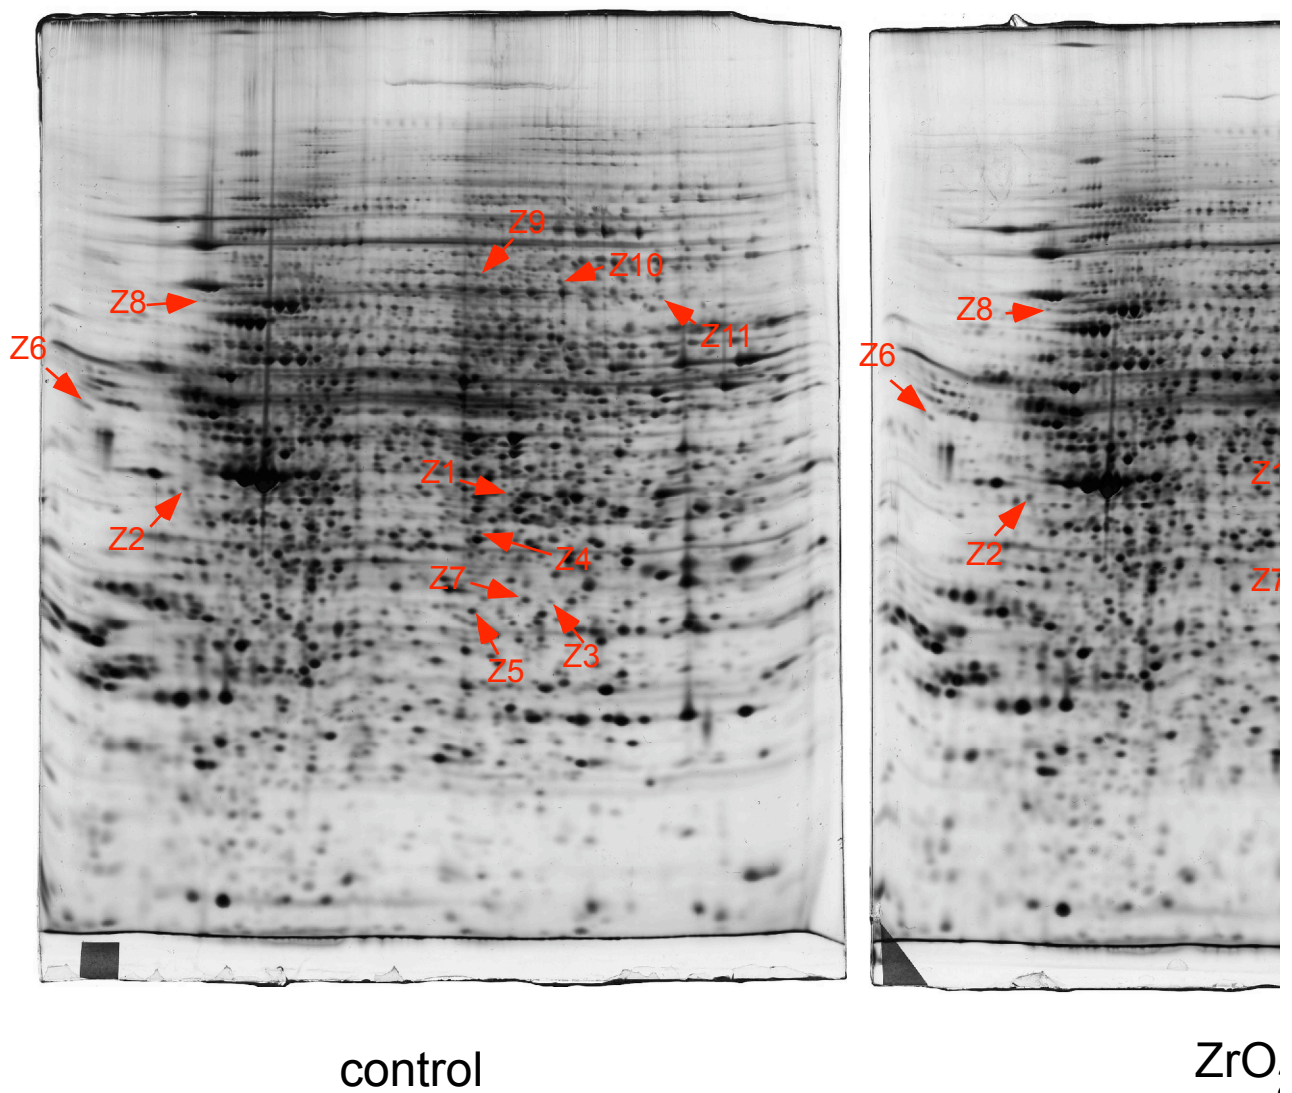

Supplementary Figure 2: 2D gel analysis of cellular proteins upon treatment by zirconium

Total cell extracts of RAW264 cells were separated by two-dimensional gel electrophoresis in the first dimension a 4-8 pH range and the second dimension a 15-200 kDa range. Total cellular proteins were detected by silver staining. The experiment was performed in triplicate. Highlighted spots vary with a t-test lower than 5% (see details in supplementary Table 3)
