# Supplementary material
Source: PubMed Central journal article supplement (PMC3820927)

Proteins identified on the basis of one unique  
peptide spectrum

5 : Heme oxygenase 1

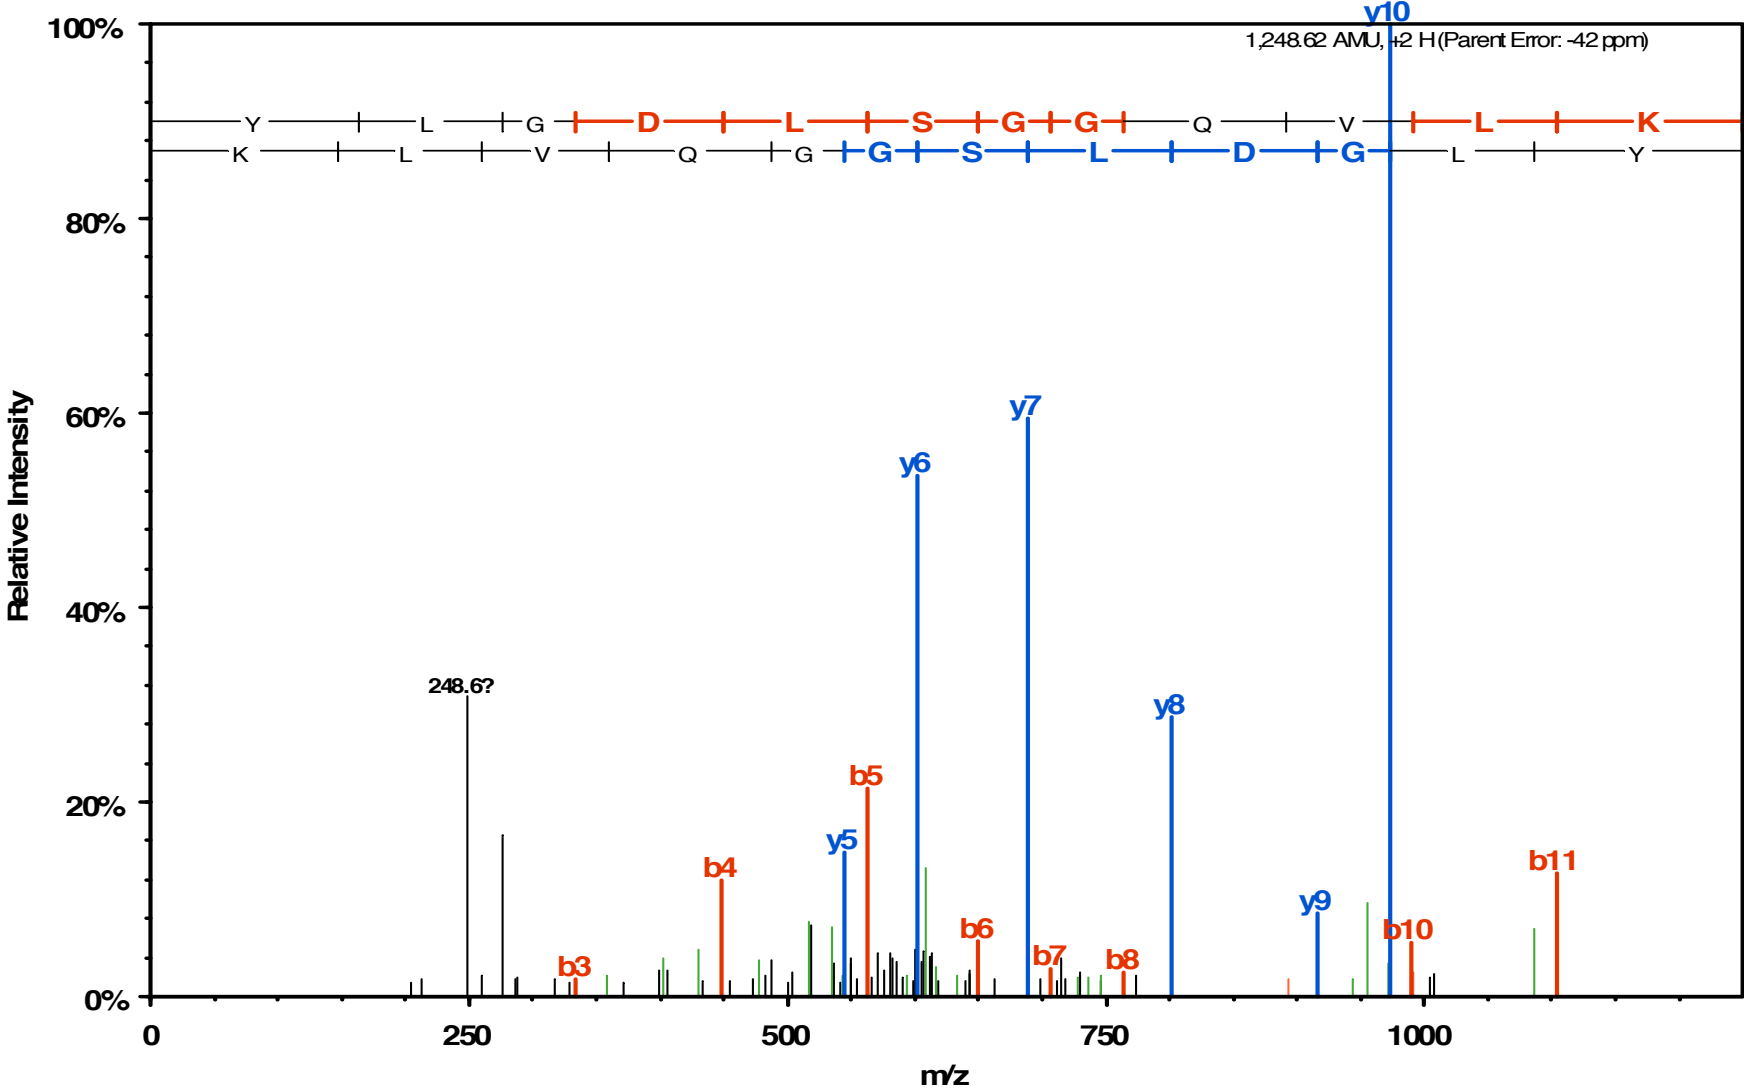

# 9 : Heme oxygenase 1

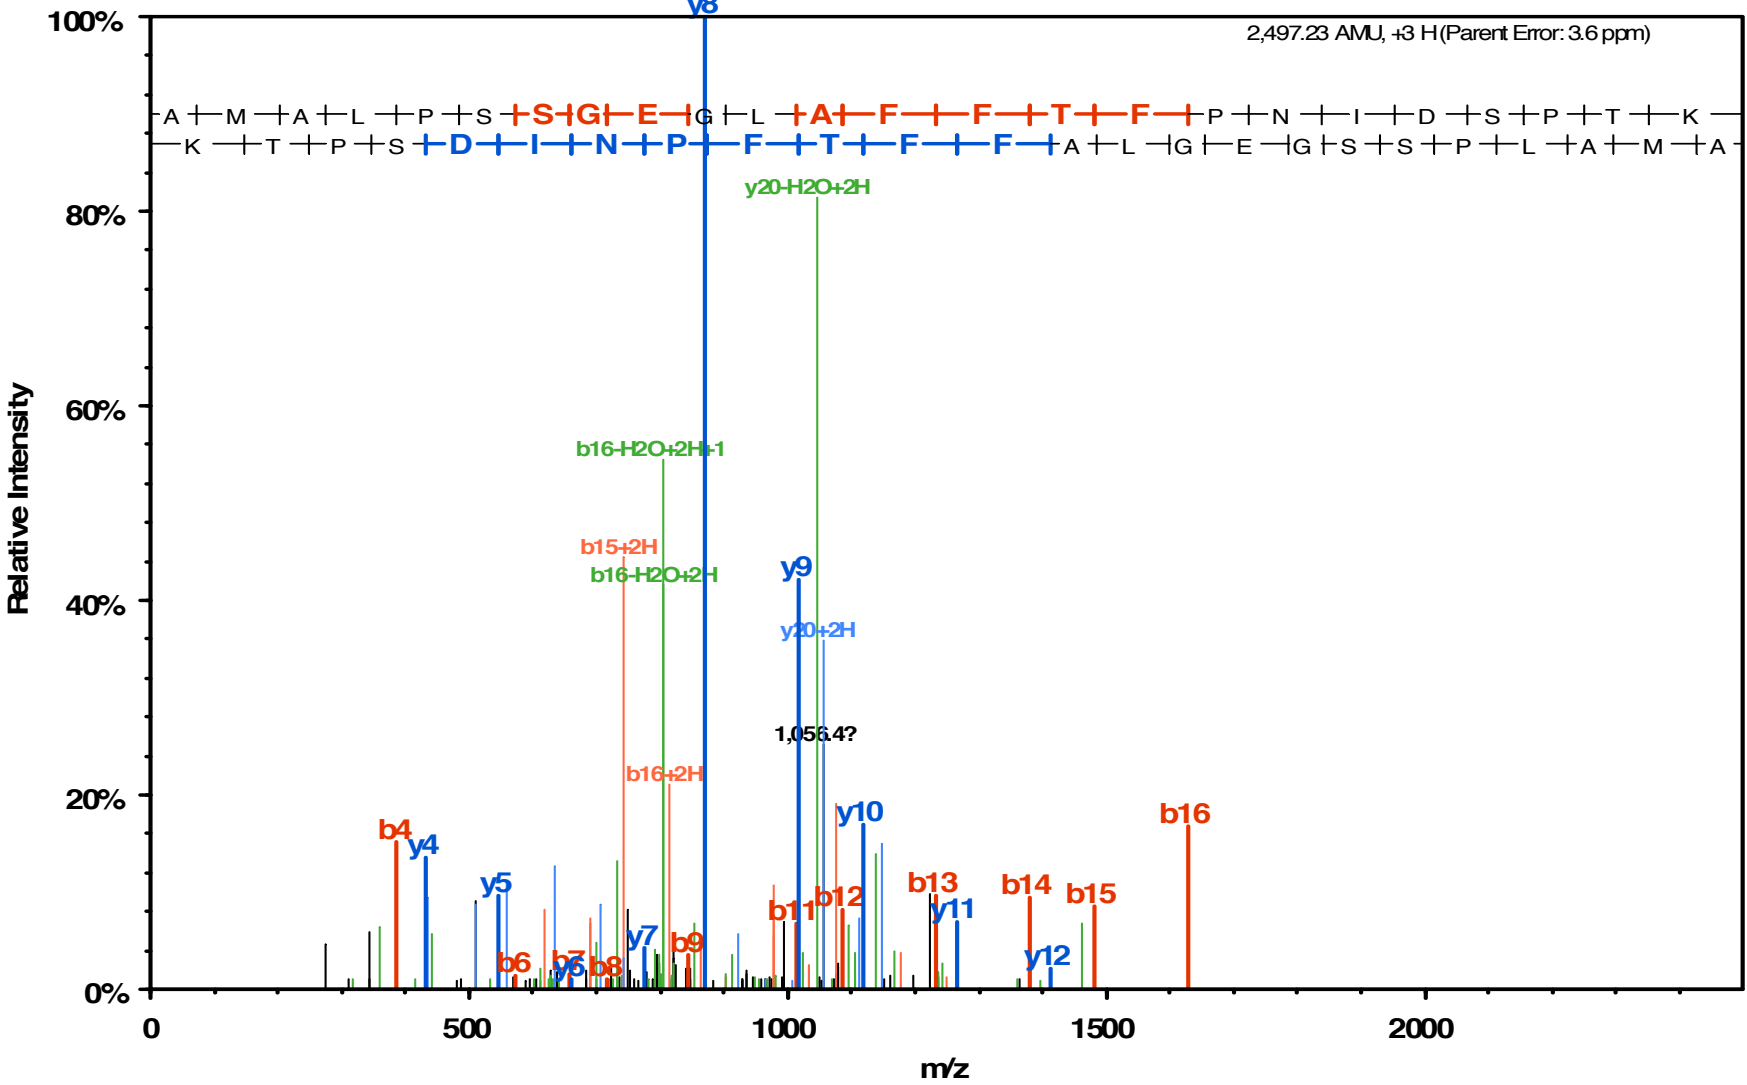

# 45 : Peptidyl-prolyl cis-trans isomerase A

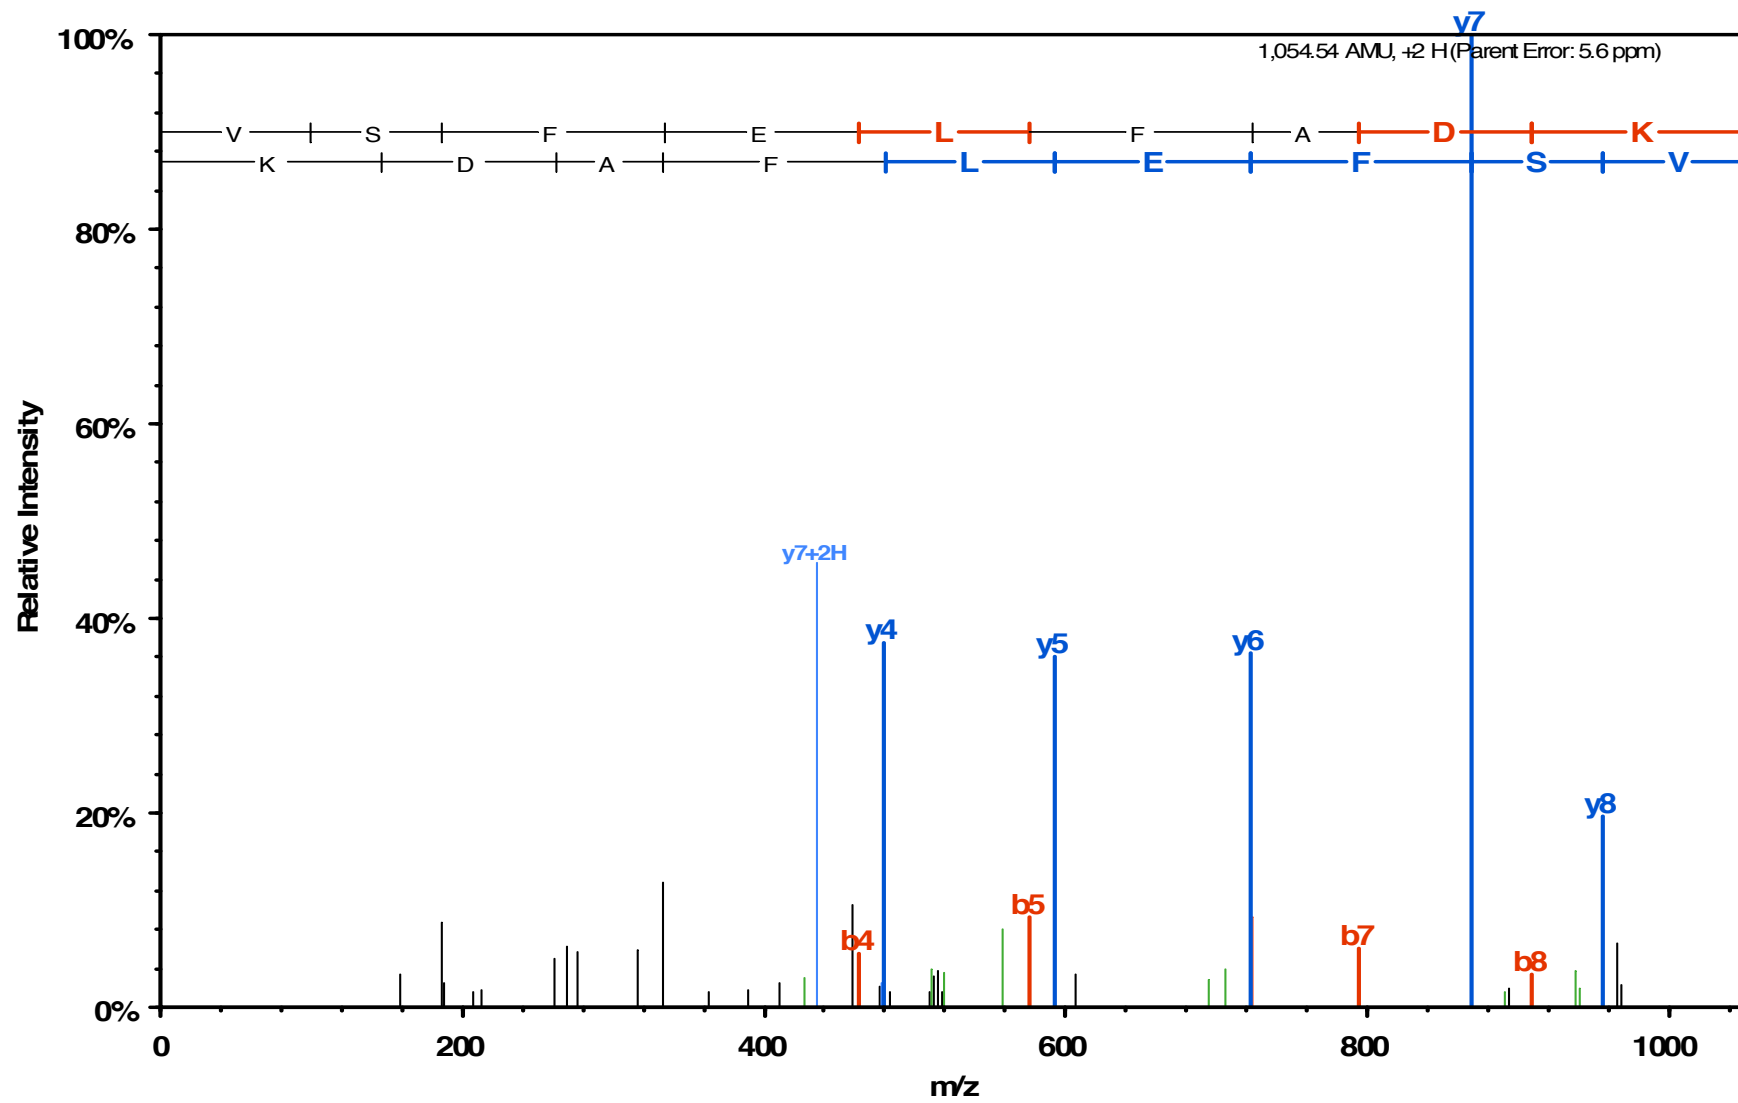

# 56 : Poly(rC)-binding protein 1

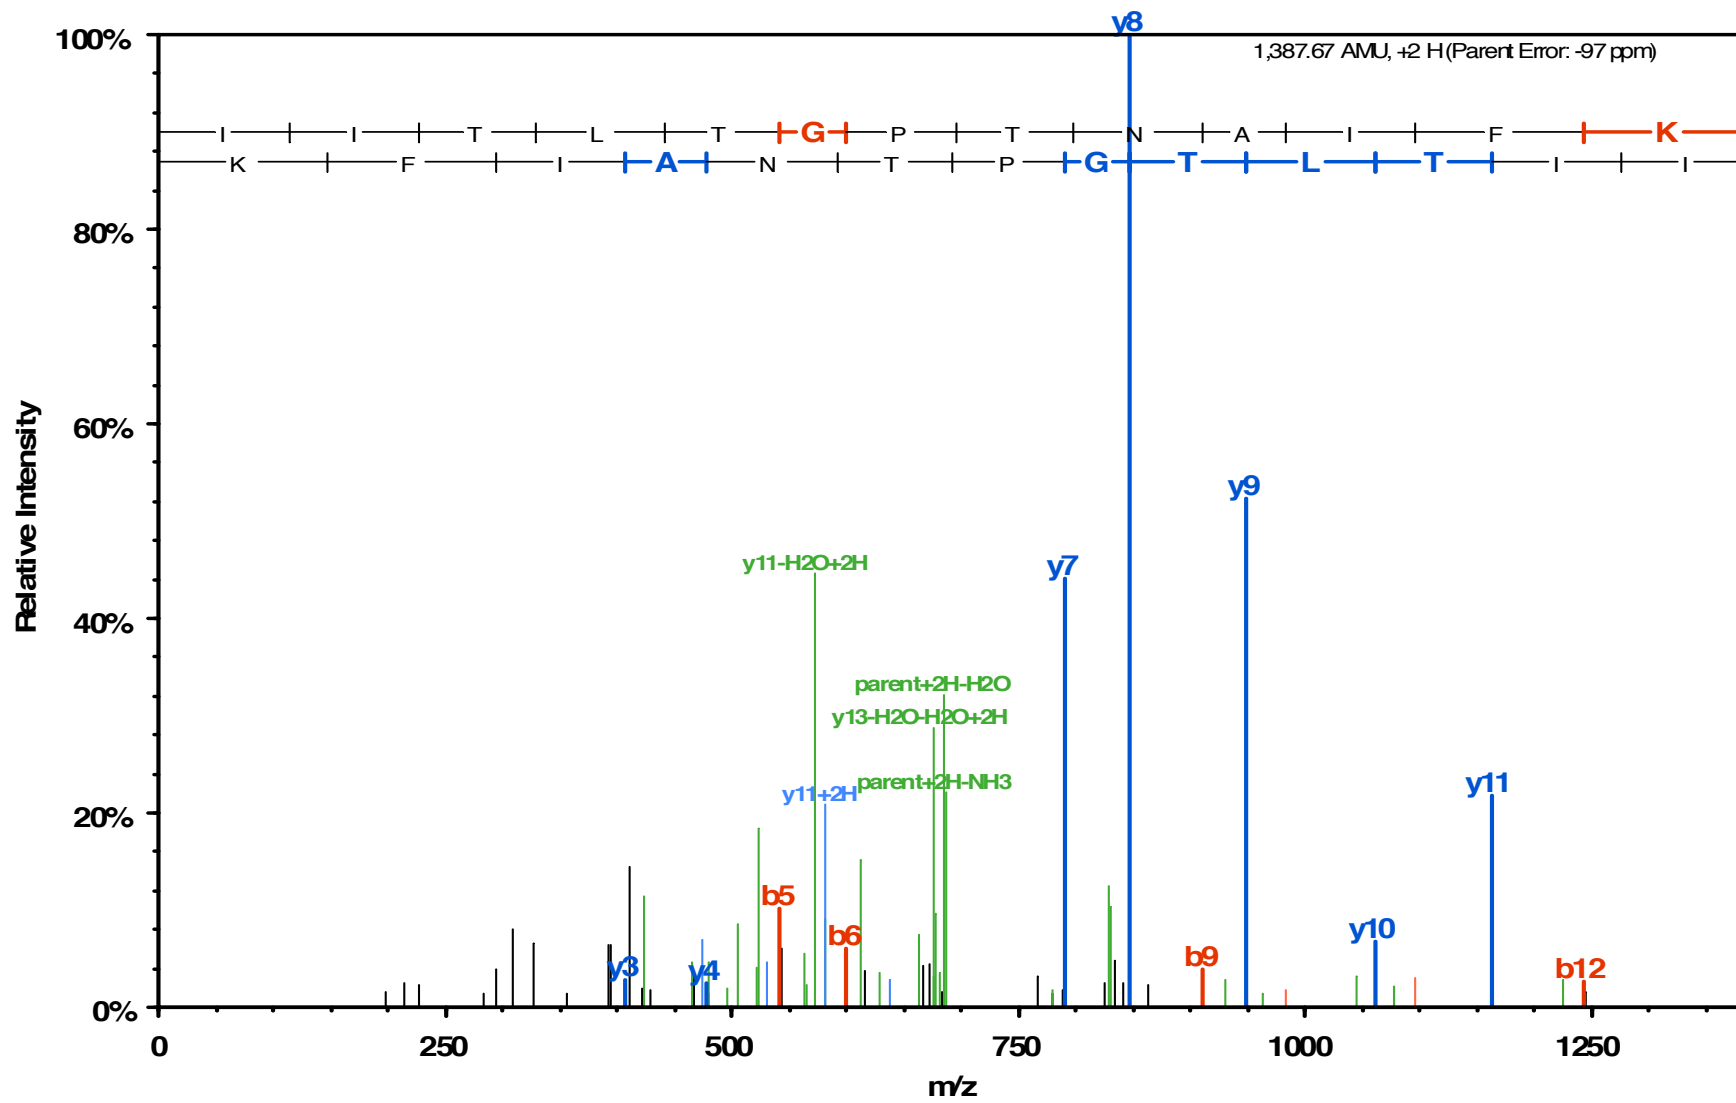

Supplement: supp_M113.030742_mcp.M113.030742-6.pdf [file supp_M113.030742_mcp.M113.030742-6.pdf]
